# Supplementary material for: Rock Surface Fungi in Deep Continental Biosphere—Exploration of Microbial Community Formation with Subsurface In Situ Biofilm Trap
Source: MDPI journal article supplement (doi:10.3390/microorganisms9010064), 2020-12-29
Supplement: s1 [file s1]

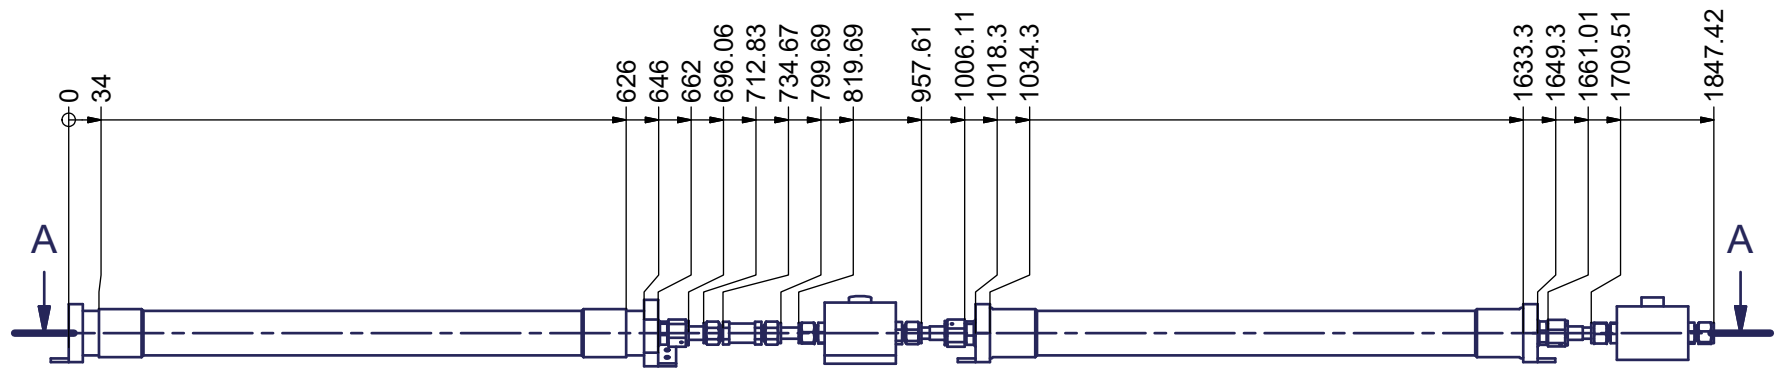

A-A ( 1:6 )

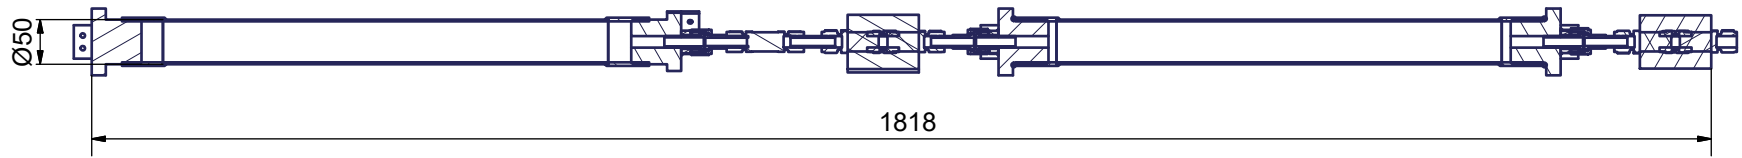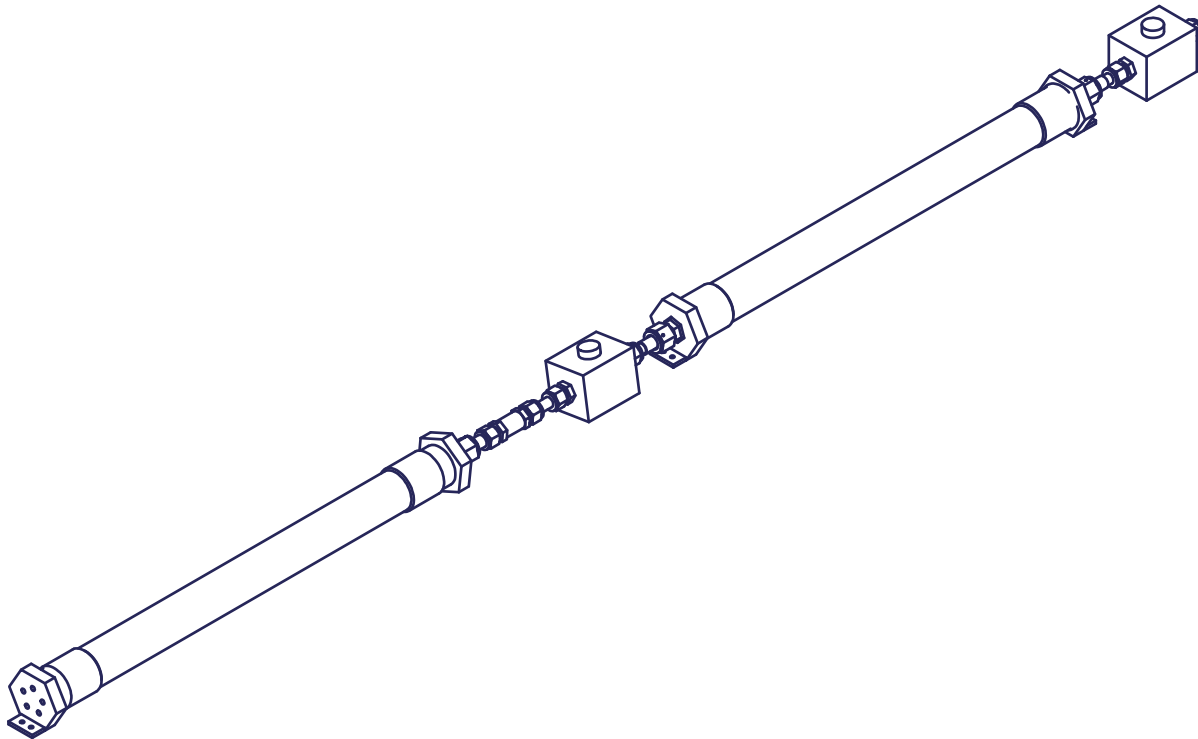

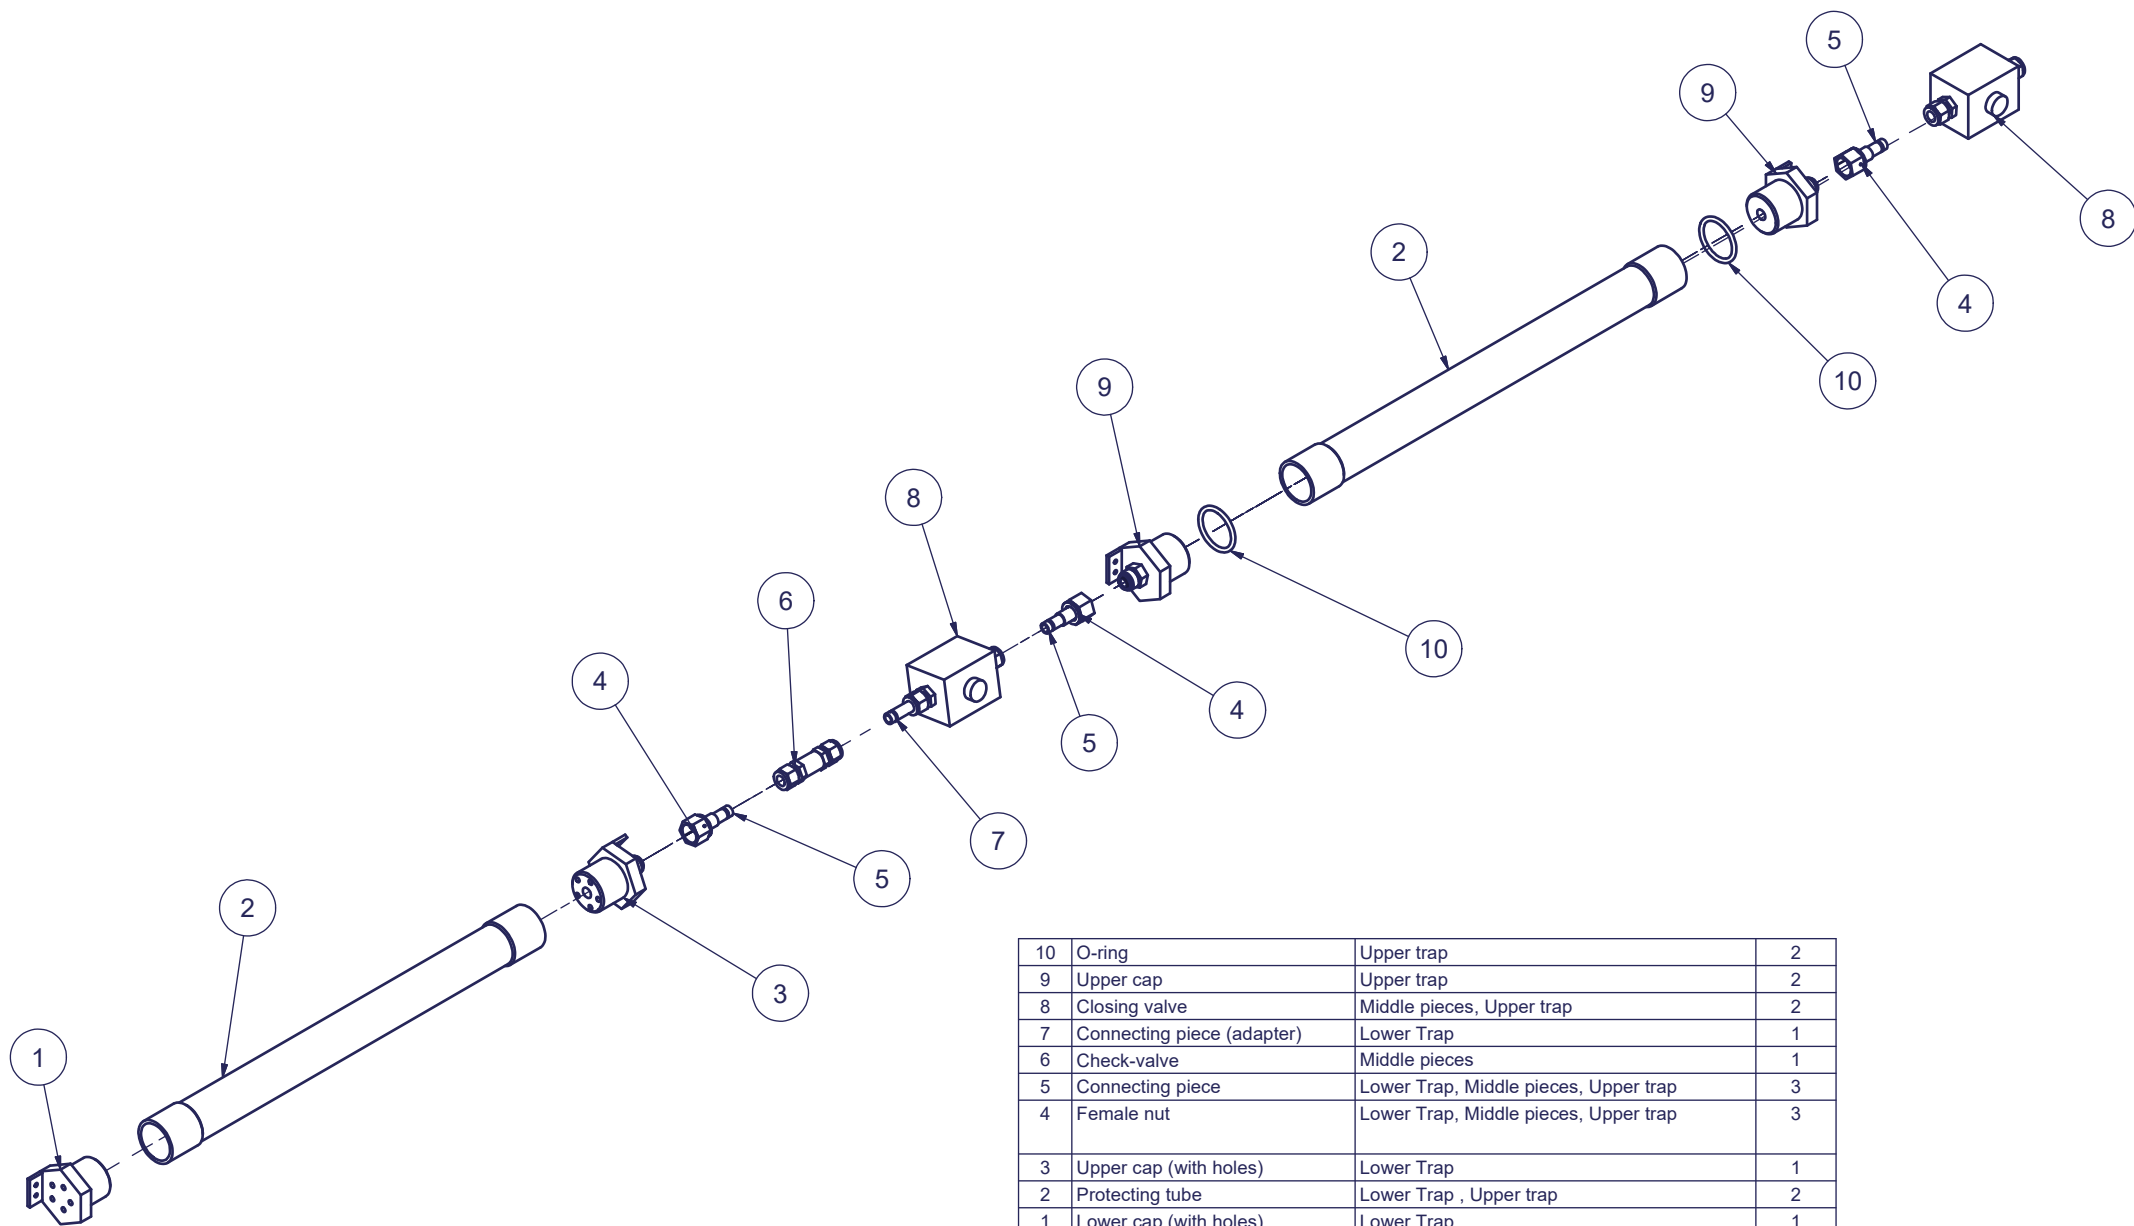

|     |                            |                                       |     |
|-----|----------------------------|---------------------------------------|-----|
| 10  | O-ring                     | Upper trap                            | 2   |
| 9   | Upper cap                  | Upper trap                            | 2   |
| 8   | Closing valve              | Middle pieces, Upper trap             | 2   |
| 7   | Connecting piece (adapter) | Lower Trap                            | 1   |
| 6   | Check-valve                | Middle pieces                         | 1   |
| 5   | Connecting piece           | Lower Trap, Middle pieces, Upper trap | 3   |
| 4   | Female nut                 | Lower Trap, Middle pieces, Upper trap | 3   |
| 3   | Upper cap (with holes)     | Lower Trap                            | 1   |
| 2   | Protecting tube            | Lower Trap , Upper trap               | 2   |
| 1   | Lower cap (with holes)     | Lower Trap                            | 1   |
| POS | Name                       | Included in                           | QTY |
